# Supplementary material for: Urban water crisis and the promise of infrastructure: a case study of Shimla, India
Source: Frontiers journal article supplement (doi:10.3389/frwa.2023.1051336), 2023-05-04
Supplement: Table_1.DOCX [file Table_1.DOCX]

Supplementary Material

# Supplementary Figures and Tables

1


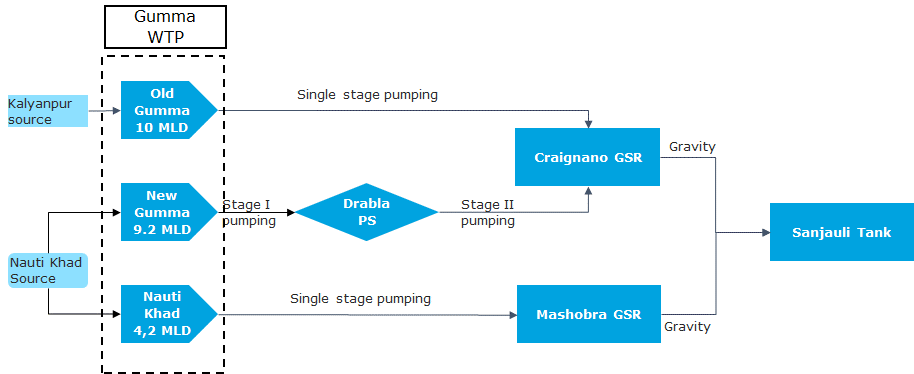


Figure : Gumma - Source to Tank


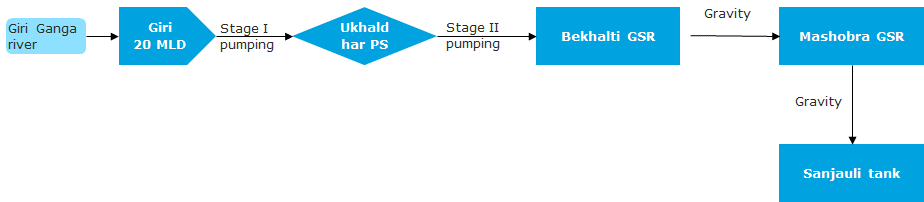
Source: Situation Analysis Report, 2018. GSWSSC

2

Figure : Giri - Source to Tank

Source: Situation Analysis Report, 2018. GSWSSC.

3


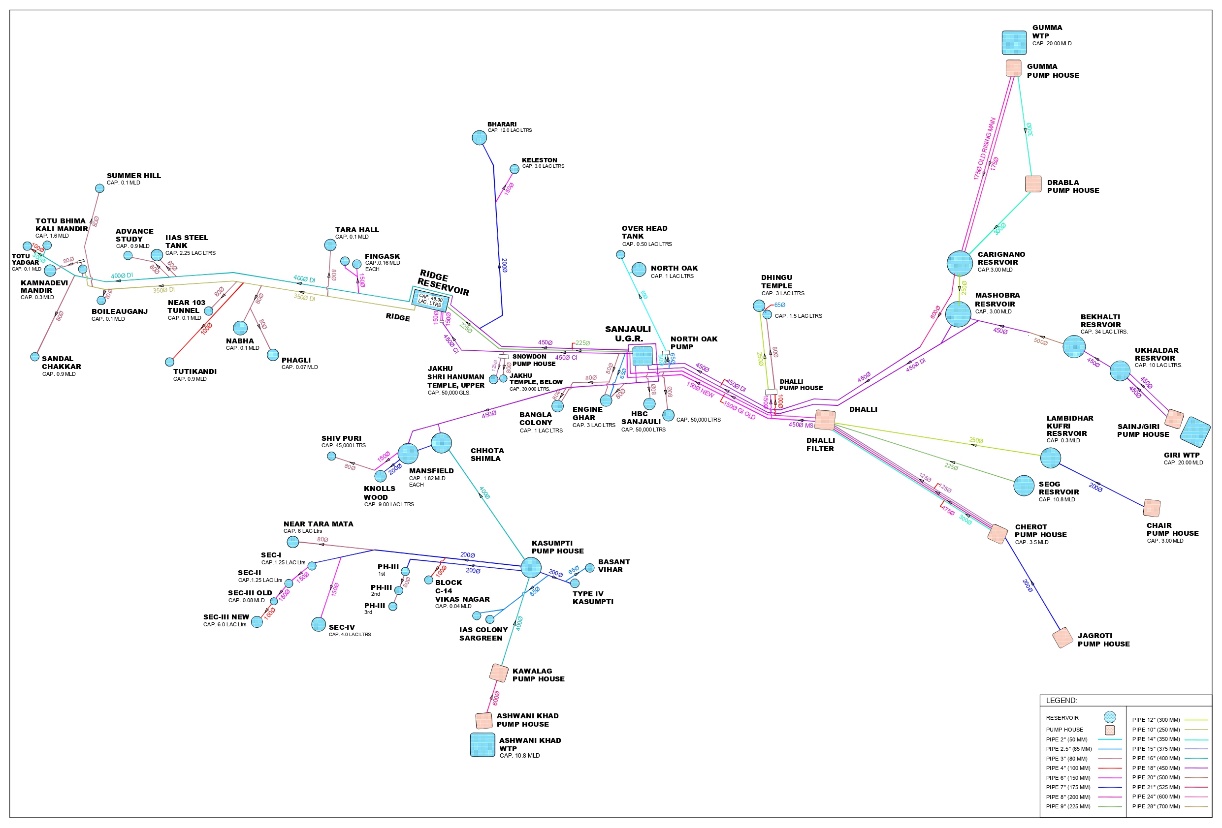


Figure : Water distribution network of Shimla. Source: SJPNL

4


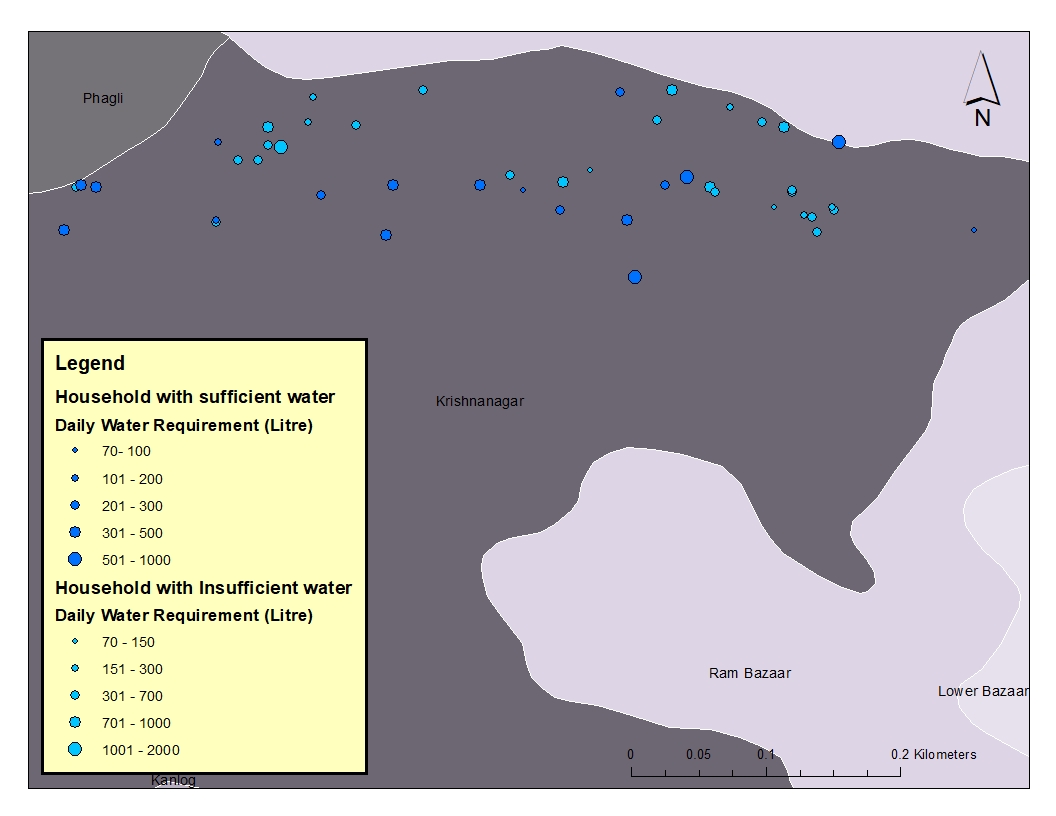


Figure : Map showing the daily water requirements of residents.
